# Supplementary material
Source: PubMed Central journal article supplement (PMC3234669)
Supplement: supp_blood-2011-01-323147_Document1.pdf [file supp_blood-2011-01-323147_Document1.pdf]

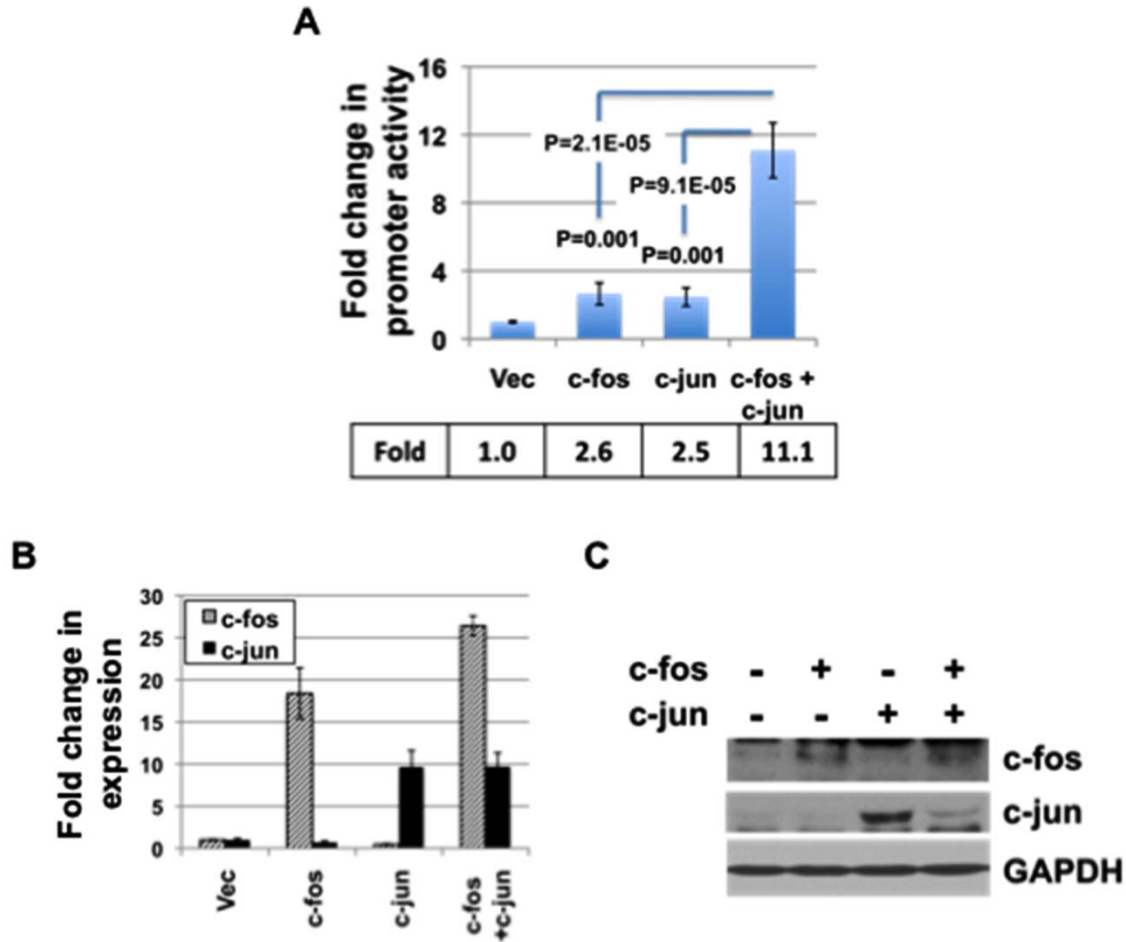

**Figure S1. AP-1 elements regulate PTPROt promoter in Mec1 cells**

Mec1 cells were transfected with PTPt-P-Luc promoter-reporter construct along with expression constructs for c-fos or c-jun or both. Luciferase activity was measured using dual luciferase assay kit. (A) Normalized promoter activity (Firefly/Renilla) is represented as fold change with respect to promoter activity in the absence of c-fos/c-jun. Overexpression of c-fos and/or c-jun was confirmed by real-time RT-PCR (B) and Western blot (C).

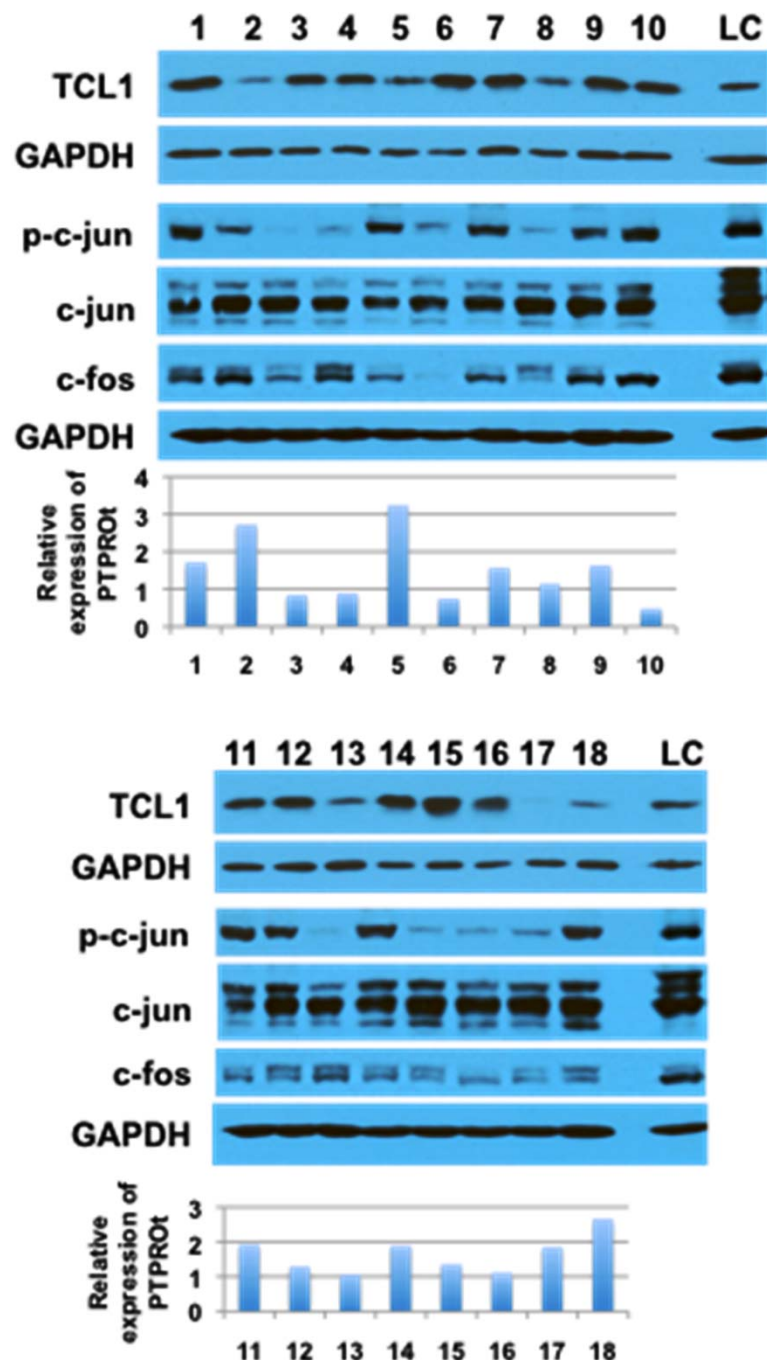

**Figure S2. Expression of TCL1, c-fos, c-jun, and phosphorylation of c-jun on primary CLL**  
 Whole cell extracts of primary CLL cells were separated on SDS-PAGE and immunoblotted with anti-TCL1, anti-p-c-jun, anti-c-jun, anti-c-fos, and anti-GAPDH. A loading control (LC) was used to normalize signal intensities between two separate gels.

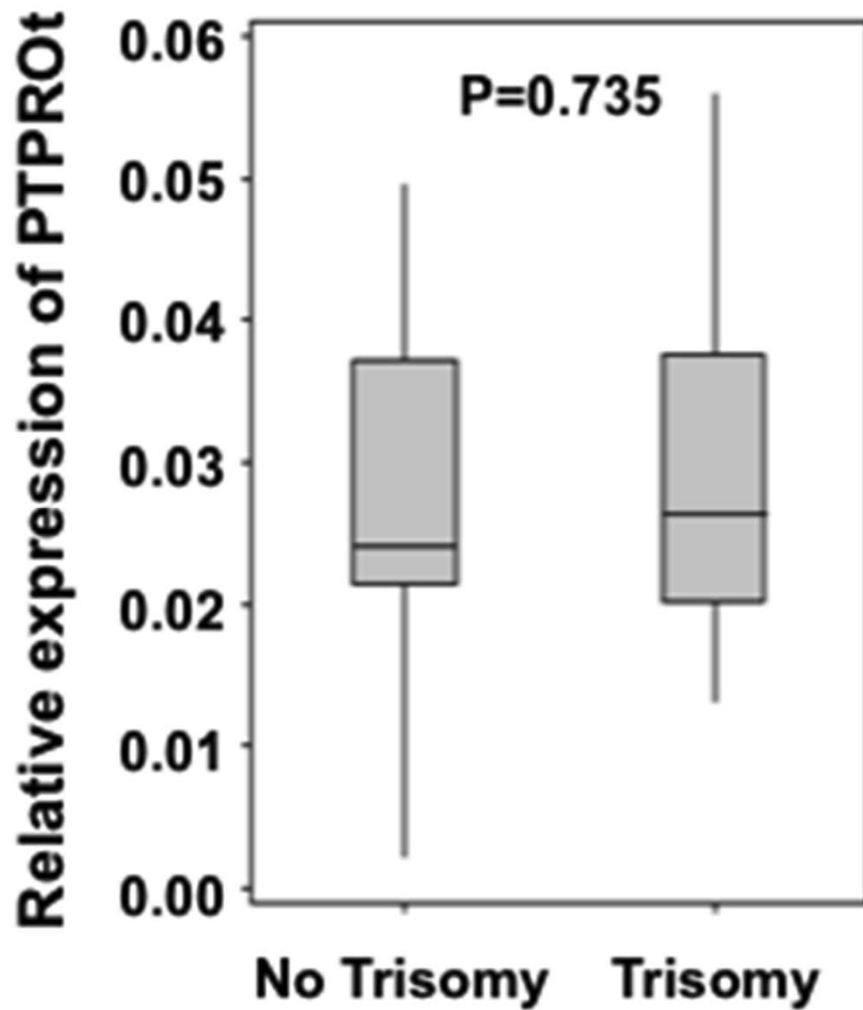

Figure S3. CLL samples with (n=14) and without (n=16) trisomy 12 were tested for the expression of PTPROt and 18S (as a normalizer)

Box plot of the relative expression of PTPROt in the two groups is plotted.
